# Supplementary material for: Screen Printed Antennas on Fiber-Based Substrates for Sustainable HF RFID Assisted E-Fulfilment Smart Packaging
Source: MDPI journal article supplement (doi:10.3390/ma14195500), 2021-09-23
Supplement: s1 [file s1]

**Table S1.** PAPERONICS substrate selection based on basic weight, suppliers, surface roughness, air permeance and sheet resistance of 2 conductive silver inks.

| Description by supplier        | Basic weight        | Supplier             | Surface Roughness | Surface Roughness | Air Permeance | Sheet Resistance [mΩ/sq] |                  |
|--------------------------------|---------------------|----------------------|-------------------|-------------------|---------------|--------------------------|------------------|
|                                | [g/m <sup>2</sup> ] |                      | [nm]              | [ml/min]          | [ml/min]      | Orgacon SI P-2000        | Loctide ECI 1011 |
| p_e:smart paper type 2         | 200                 | Schoeller Technocell | 114 ± 15          | 2 ± 1             | 13 ± 1        | 24 ± 1                   | 10 ± 1           |
| p_e:smart paper type 3         | 170                 | Schoeller Technocell | 169 ± 35          | /                 | /             | 45 ± 7                   | 30 ± 1           |
| p_e:smart paper type 1         | 190                 | Schoeller Technocell | 172 ± 23          | 0,2 ± 0,1         | /             | 33 ± 1                   | 25 ± 1           |
| Unknown                        | 295                 | Smurfit Kappa        | 279 ± 45          | 29 ± 7            | 50 ± 1        | 9 ± 1                    | 13 ± 1           |
| Powercoat HD 95                | 97                  | Arjowiggins          | 288 ± 70          | 10 ± 2            | /             | 57 ± 1                   | 71 ± 6           |
| Parade Label A                 | 120                 | Sappi                | 315 ± 66          | 11 ± 3            | /             | 21 ± 5                   | 14 ± 1           |
| Incada Exel                    | 280                 | Iggesund Paperboard  | 351 ± 75          | 14 ± 4            | 28 ± 1        | 15 ± 1                   | 13 ± 3           |
| Koehler TypeE                  |                     | Koehler Paper Group  | 360 ± 50          | 28 ± 18           | 0,2 ± 0,1     | 25 ± 1                   | 26 ± 1           |
| LumiSilk                       | 130                 | Stora Enso           | 367 ± 51          | 11 ± 3            | 0,4 ± 0,1     | 13 ± 1                   | 12 ± 1           |
| Carta Solida                   | 350                 | Smurfit Kappa        | 402 ± 67          | 46 ± 9            | 59 ± 7        | 9 ± 1                    | 13 ± 1           |
| Algro Baress                   | 120                 | Sappi                | 404 ± 103         | 45 ± 17           | 0,6 ± 0,1     | 22 ± 1                   | 14 ± 1           |
| Powercoat HD 230               | 219                 | Arjowiggins          | 406 ± 77          | 9 ± 1             | /             | 64 ± 3                   | 54 ± 11          |
| Magno Satin                    | 135                 | Sappi (Papyrus)      | 424 ± 24          | 12 ± 3            | 0,2 ± 0,1     | 28 ± 6                   | 32 ± 2           |
| Silvaboard                     | 300                 | Smurfit Kappa        | 486 ± 43          | 51 ± 15           | 20 ± 1        | 10 ± 1                   | 14 ± 1           |
| Korsnas Light                  | 250                 | Rembrandt Verpakking | 487 ± 63          | 51 ± 16           | 28 ± 2        | 17 ± 2                   | 15 ± 1           |
| Carta Elega                    | 350                 | Smurfit Kappa        | 488 ± 34          | 64 ± 20           | 21 ± 2        | 10 ± 1                   | 13 ± 1           |
| Custom K                       | 415                 | Rembrandt Verpakking | 496 ± 4           | 86 ± 7            | 33 ± 4        | 19 ± 1                   | 14 ± 2           |
| PG90                           | 90                  | Grünperga            | 555 ± 93          | 539 ± 384         | /             | 28 ± 1                   | 19 ± 1           |
| CMPC Cartulina                 | 270                 | Rembrandt Verpakking | 558 ± 94          | 134 ± 57          | 28 ± 2        | 19 ± 3                   | 13 ± 1           |
| Accurate Top                   | 290                 | Rembrandt Verpakking | 564 ± 100         | 44 ± 13           | 20 ± 1        | 16 ± 1                   | 12 ± 1           |
| Metsaboard                     | 340                 | Rembrandt Verpakking | 572 ± 63          | 14 ± 2            | 60 ± 2        | 18 ± 1                   | 13 ± 1           |
| UPM Finesse Premium Silk H 90  | 90                  | UPM                  | 623 ± 94          | 18 ± 2            | /             | 11 ± 1                   | 11 ± 1           |
| Rochcoat                       | 275                 | Rembrandt Verpakking | 687 ± 155         | 39 ± 8            | 32 ± 1        | 16 ± 1                   | 13 ± 1           |
| BHW31                          | 495                 | DS Smith             | 694 ± 131         | 2256 ± 86         | 24 ± 2        | 44 ± 6                   | 21 ± 1           |
| BGV035THT                      | 445                 | Smurfit Kappa        | 706 ± 239         | 798 ± 26          | 22 ± 4        | 29 ± 2                   | 20 ± 2           |
| PG70                           | 70                  | Grünperga            | 714 ± 212         | 136 ± 36          | /             | 28 ± 2                   | 20 ± 2           |
| Koehler TypB                   |                     | Koehler Paper Group  | 735 ± 57          | 31 ± 6            | 13 ± 1        | 29 ± 1                   | 36 ± 7           |
| Korsnas C                      | 480                 | Rembrandt Verpakking | 771 ± 113         | 54 ± 14           | 50 ± 2        | 21 ± 3                   | 14 ± 1           |
| UPM Finesse Premium Silk H 115 | 115                 | UPM                  | 813 ± 29          | 20 ± 4            | 2 ± 1         | 12 ± 1                   | 12 ± 1           |
| RHR21                          | 410                 | DS Smith             | 898 ± 122         | 335 ± 115         | 10 ± 2        | 27 ± 1                   | 21 ± 1           |
| PG60                           | 60                  | Grünperga            | 900 ± 228         | 145 ± 14          | /             | 29 ± 1                   | 20 ± 1           |
| Koehler TypA                   |                     | Koehler Paper Group  | 945 ± 36          | 29 ± 4            | /             | 42 ± 2                   | 45 ± 3           |
| Koehler TypD                   |                     | Koehler Paper Group  | 1030 ± 79         | 53 ± 21           | 0,2 ± 0,1     | 35 ± 2                   | 25 ± 3           |
| MA8941                         | 180                 | Ahlstrom Munksjö     | 1087 ± 122        | 70 ± 19           | 41 ± 2        | 35 ± 2                   | 36 ± 4           |
| CoatedPAC LC WTCL160           | 160                 | DS Smith             | 1093 ± 190        | 100 ± 19          | 17 ± 2        | 35 ± 2                   | 25 ± 1           |
| Powercoat XD 200               | 202                 | Arjowiggins          | 1319 ± 199        | 39 ± 5            | 31 ± 1        | 40 ± 2                   | 39 ± 3           |
| Powercoat XD 125               | 129                 | Arjowiggins          | 1356 ± 76         | 41 ± 5            | 5 ± 1         | 36 ± 1                   | 34 ± 4           |
| CoatedPAC LC WTCL140           | 140                 | DS Smith             | 1368 ± 191        | 109 ± 15          | 8 ± 1         | 37 ± 1                   | 24 ± 1           |

Paper substrates indicated in color are given in Table 1. Ultimate selection of fiber-based substrates, compatible with printed electronics.

**Table S1.** PAPERONICS substrate selection based on basic weight, suppliers, surface roughness, air permeance and sheet resistance of 2 conductive silver inks.

| Description by supplier       | Basic weight        | Supplier             | Surface Roughness | Surface Roughness | Air Permeance  | Sheet Resistance [mΩ/sq] |                  |
|-------------------------------|---------------------|----------------------|-------------------|-------------------|----------------|--------------------------|------------------|
|                               | [g/m <sup>2</sup> ] |                      | [nm]              | [ml/min]          | [ml/min]       | Orgacon SI P-2000        | Loctide ECI 1011 |
| Magazine Paper                | 52                  | Stora Enso           | 1887 ± 299        | 51 ± 2            | 161 ± 6        | 16 ± 2                   | 13 ± 1           |
| PackPro 7.5                   | 45-60               | PackPro              | 2103 ± 326        | 154 ± 55          | /              | 13 ± 1                   | 17 ± 1           |
| UPM Digi Fine Jet             | 90                  | UPM                  | 2250 ± 199        | 114 ± 15          | 618 ± 10       | 25 ± 2                   | 39 ± 2           |
| Tyvek 1073D, PE wit           | 75                  | DuPont               | 2257 ± 179        | 536 ± 126         | 655 ± 93       | /                        | /                |
| UPM Fine 140                  | 140                 | UPM                  | 2261 ± 69         | 136 ± 16          | 400 ± 11       | 21 ± 2                   | 46 ± 1           |
| R6310                         | 400                 | Schutpapier          | 2303 ± 80         | 363 ± 55          | 83 ± 2         | 21 ± 3                   | 16 ± 1           |
| ML 9084                       | 87                  | Mitsubishi           | 2335 ± 255        | 118 ± 4           | 507 ± 6        | 23 ± 6                   | 18 ± 1           |
| DNS Premium                   | 120                 | Mondi                | 2393 ± 253        | 107 ± 13          | 717 ± 17       | 24 ± 1                   | 48 ± 3           |
| BergaMail+ 80                 | 80                  | Stora Enso           | 2438 ± 425        | 174 ± 10          | 638 ± 3        | 15 ± 2                   | 28 ± 3           |
| Soporset Premium Offset       | 130                 | Navigator            | 2486 ± 331        | 220 ± 15          | 447 ± 15       | 19 ± 1                   | 51 ± 6           |
| EWV017THT                     | 370                 | Smurfit Kappa        | 2571 ± 248        | 1493 ± 206        | 320 ± 11       | 24 ± 1                   | 21 ± 2           |
| UPM Poste 90                  | 90                  | UPM                  | 2575 ± 226        | 212 ± 21          | 625 ± 9        | 17 ± 1                   | 26 ± 2           |
| R2904 - alcohol barrier paper | 100                 | Schutpapier          | 2627 ± 213        | 64 ± 12           | 0,6 ± 0,3      | 16 ± 4                   | 13 ± 1           |
| R6326                         | 200                 | Schutpapier          | 2639 ± 342        | 339 ± 31          | 313 ± 26       | 15 ± 1                   | 39 ± 6           |
| RRE31                         | 370                 | DS Smith             | 2745 ± 59         | 1525 ± 319        | 116 ± 6        | 28 ± 1                   | 33 ± 1           |
| UPM Poste 100                 | 100                 | UPM                  | 2883 ± 270        | 247 ± 156         | 827 ± 31       | 20 ± 3                   | 61 ± 10          |
| Acryl/Latex impregnated       | 130                 | Schutpapier          | 2884 ± 310        | 469 ± 80          | 23 ± 2         | 13 ± 1                   | 12 ± 1           |
| MultiOffset                   | 120                 | Papyrus              | 2934 ± 552        | 362 ± 51          | 629 ± 14       | 48 ± 1                   | 143 ± 20         |
| CRE42                         | 455                 | DS Smith             | 2973 ± 527        | 2818 ± 376        | 148 ± 2        | 37 ± 1                   | 24 ± 1           |
| BergaMail+ 90                 | 90                  | Stora Enso           | 2980 ± 220        | 291 ± 40          | 445 ± 8        | 16 ± 1                   | 20 ± 1           |
| BergaMail+ 120                | 120                 | Stora Enso           | 2992 ± 283        | 288 ± 11          | 615 ± 19       | 19 ± 1                   | 35 ± 4           |
| Kraftpack                     | 307                 | Rembrandt Verpakking | 3070 ± 372        | 1373 ± 159        | 747 ± 38       | 21 ± 3                   | 25 ± 1           |
| UPM Poste 120                 | 120                 | UPM                  | 3134 ± 125        | 251 ± 18          | 829 ± 44       | 19 ± 2                   | 59 ± 3           |
| BergaMail+ 100                | 100                 | Stora Enso           | 3231 ± 467        | 237 ± 13          | 686 ± 17       | 17 ± 1                   | 35 ± 2           |
| UPM Fine 100                  | 100                 | UPM                  | 3356 ± 563        | 383 ± 39          | 695 ± 26       | 15 ± 1                   | 22 ± 4           |
| UPM Fine 90                   | 90                  | UPM                  | 3362 ± 570        | 340 ± 27          | 629 ± 10       | 16 ± 3                   | 22 ± 3           |
| UPM Poste 80                  | 80                  | UPM                  | 3528 ± 188        | 217 ± 18          | 674 ± 27       | 16 ± 1                   | 46 ± 3           |
| TL100                         | 100                 | VPK Packaging        | 3528 ± 187        | 1045 ± 69         | 547 ± 22       | 20 ± 2                   | 33 ± 2           |
| REE32                         | 405                 | DS Smith             | 3561 ± 528        | 2082 ± 136        | 226 ± 11       | 39 ± 1                   | 89 ± 2           |
| BVT055THT                     | 460                 | Smurfit Kappa        | 3571 ± 525        | 1485 ± 123        | 159 ± 4        | 25 ± 1                   | 22 ± 1           |
| BKK089THT                     | 715                 | Smurfit Kappa        | 3789 ± 459        | 1549 ± 163        | 207 ± 12       | 44 ± 1                   | 88 ± 19          |
| MA8067                        | 147                 | Ahlstrom Munksjö     | 4226 ± 562        | 831 ± 8           | Not measurable | 137 ± 12                 | 168 ± 12         |
| CEE24                         | 620                 | DS Smith             | 4338 ± 339        | 2305 ± 353        | 215 ± 8        | 34 ± 1                   | 35 ± 2           |
| FPG75                         | 75                  | Grünperga            | 4395 ± 842        | 908 ± 137         | 2878 ± 78      | 92 ± 14                  | 76 ± 4           |
| BTT041BNL                     | 385                 | Smurfit Kappa        | 4460 ± 1277       | 1557 ± 81         | 434 ± 16       | 27 ± 2                   | 36 ± 5           |
| C100                          | 100                 | VPK Packaging        | 4692 ± 358        | 1327 ± 86         | 412 ± 19       | 19 ± 4                   | 35 ± 3           |
| M300                          | 300                 | VPK Packaging        | 5301 ± 792        | 2011 ± 136        | 133 ± 6        | 24 ± 7                   | 25 ± 1           |
